# Supplementary material
Source: HighWire-hosted journal article supplement (https://cmajopen.ca/highwire/filestream/90685/field_highwire_adjunct_files/1/open-2022-0252-2-at.pdf)

Improving Physician Wellness through the Applied Mindfulness Program for Medical Personnel (AMP-MP): Findings from a Prospective Qualitative Study

**Appendix: Intervention Enrollment Flow Chart**

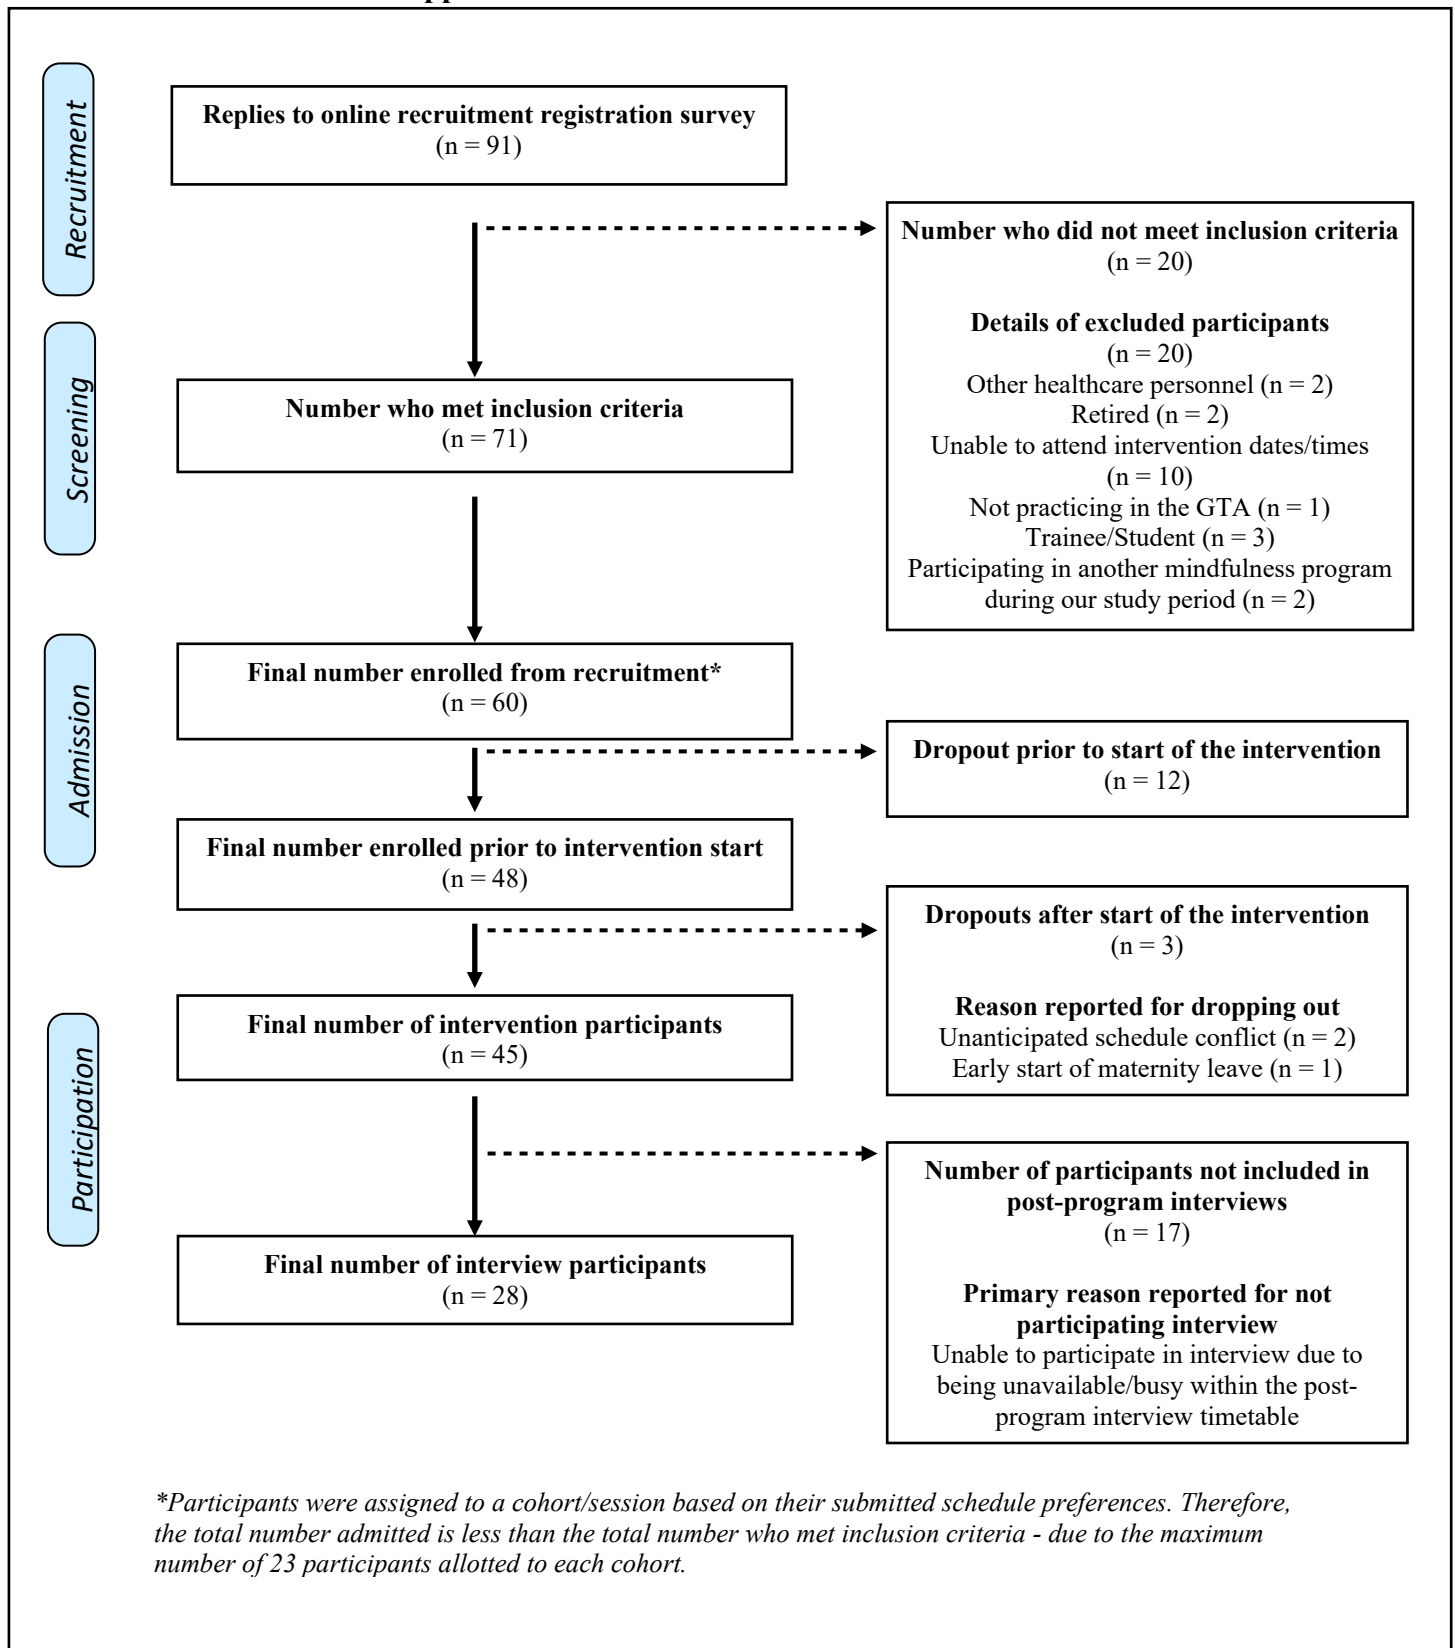

Supplement: open-2022-0252-2-at.pdf [file open-2022-0252-2-at.pdf]
